# Supplementary material for: Effectiveness of Flattening-Filter-Free versus Flattened Beams in V79 and Glioblastoma Patient-Derived Stem-like Cells
Source: MDPI journal article supplement (doi:10.3390/ijms24021107), 2023-01-06
Supplement: s1 [file s1]

**Table S1.** Patient characteristics and GSCs tumor biomarkers for lines #1 and #83.

|                                | #1                           | #83                               | Ref.                     |
|--------------------------------|------------------------------|-----------------------------------|--------------------------|
| Patient age (y)/sex (M/F)      | 40/M                         | 52/M                              | [Pallini R et al. 2008]  |
| Tumour location                | Temporal close to SVZ        | Temporal close to SVZ             | [Guidoni L et al. 2014]  |
| KPS (%)                        | 80                           | 70                                | [Pallini R et al. 2008]  |
| CD133 (%)                      | >80                          | <1                                | [Guidoni L et al. 2014]  |
| Ki67 (%)                       | 20                           | 40                                | [Pallini R et al. 2008]  |
| PFS (m)                        | 6                            | 3                                 | [Pallini R et al. 2008]  |
| OS (m)                         | 12.5                         | 8.5                               | [Pallini R et al 2008]   |
| Clonogenic index               | 1/4.32                       | 1/2.66                            | [Guidoni L et al. 2014]  |
| Sox2                           | +                            | +                                 | [Guidoni L et al. 2014]  |
| GFAP                           | +                            | +                                 | [Guidoni L et al. 2014]  |
| Tubulina Beta3                 | +                            | +                                 | [Guidoni L et al. 2014]  |
| Metabolic phenotype            | Neuronal                     | Astrocyte-glioma                  | [Guidoni L. et al. 2014] |
| Gene expression/phenotype      | proneural-like signature/GSf | mesenchymal-like signature/GSr    | [Marziali G. et al 2017] |
| Growth pattern <i>in vitro</i> | floating spheres             | adherent growth and small spheres | [Guidoni L. et al 2014]  |
| Doubling time (d)              | 4.7                          | 2.2                               | [Guidoni L. et al 2014]  |
| p53 (by NGS)                   | Wild Type                    | Mutant in exon 5                  | [personal communication] |

KPS, Karnofsky performance status; PFS, progression-free survival; OS, overall survival; GFAP, Glial fibrillary acidic protein; GSf, glioblastoma full stem; GSr, glioblastoma restricted stem; NGS, Next Generation Sequencing

Pallini, R.; Ricci-Vitiani, L.; Banna, G.L.; Signore, M.; Lombardi, D.; Todaro, M.; Stassi, G.; Martini, M.; Maira, G.; Larocca, L.M.; De Maria, R. Cancer stem cell analysis and clinical outcome in patients with glioblastoma multiforme. *Clin. Cancer. Res.* **2008**, *14* (24), 8205-12. doi: 10.1158/1078-0432.CCR-08-0644.

Guidoni, L.; Ricci-Vitiani, L.; Rosi, A.; Palma, A.; Grande, S.; Luciani, A.M.; Pelacchi F.; di Martino, S.; Colosimo, C.; Biffoni, M.; De Maria, R.; Pallini, R.; Viti. V. 1H NMR detects different metabolic profiles in glioblastoma stem-like cells. *NMR Biomed.* **2014**, *27*(2), 129-45. doi: 10.1002/nbm.3044.

Marziali, G.; Signore, M.; Buccarelli, M.; Grande, S.; Palma, A.; Biffoni, M.; Rosi, A.; D'Alessandris, Q.G.; Martini, M.; Larocca, L.M.; De Marias, R.; Pallini, R.; Ricci-Vitiani, L. Metabolic/Proteomic Signature Defines Two Glioblastoma Subtypes With Different Clinical Outcome. *Sci Rep* **2016**, *6*, 21557. doi: 10.1038/srep21557.
