# Supplementary material for: Effectiveness of Flattening-Filter-Free versus Flattened Beams in V79 and Glioblastoma Patient-Derived Stem-like Cells
Source: MDPI journal article supplement (doi:10.3390/ijms24021107), 2023-01-06
Supplement: s1 [file s1]

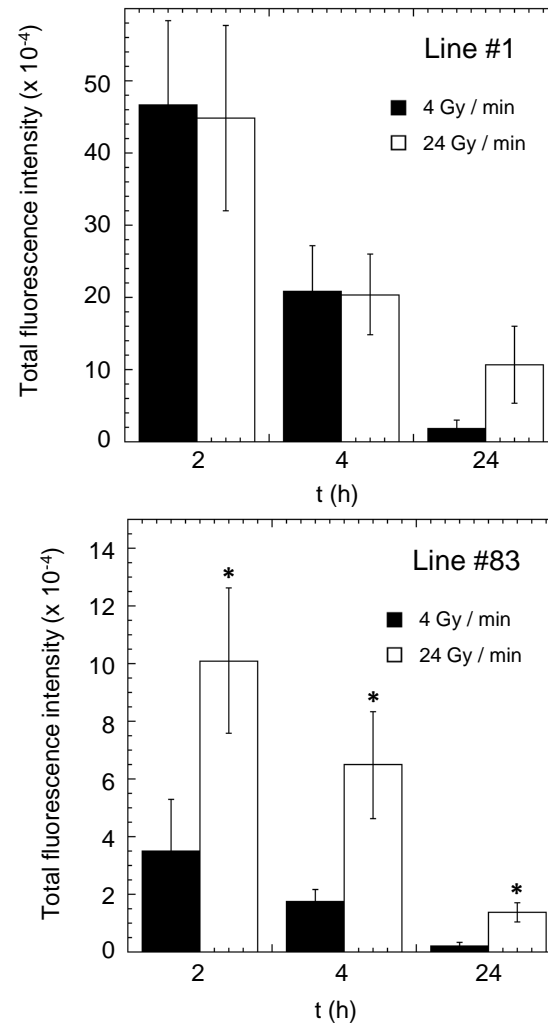

**Figure S1.** Dephosphorylation of  $\gamma$ -H2AX in line #1 and line #83 after the dose of 20 Gy at 2, 4 and 24 h from irradiation. \*  $p < 0.01$

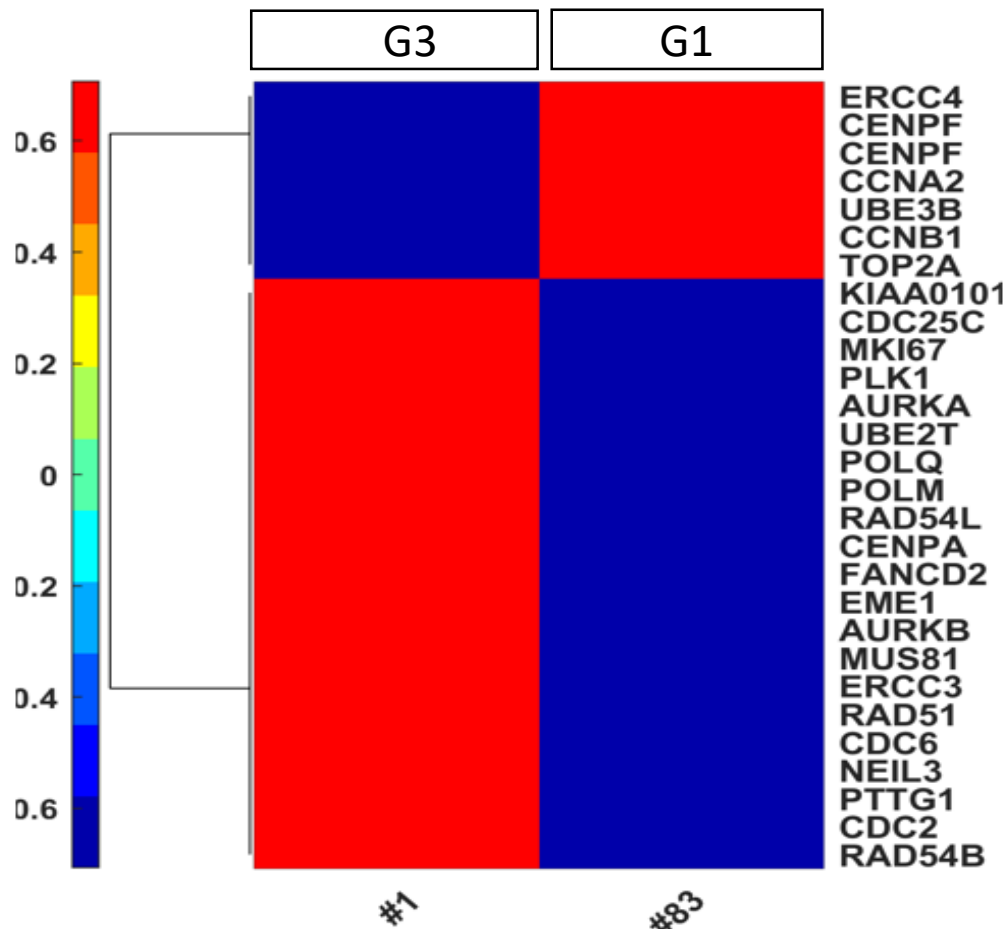

**Figure S2.** Heatmap of cell lines #1 and #83 illustrating the 2 components as defined by Gobin et al. Standardized expression values are depicted using a red (high) to green (low) color key.

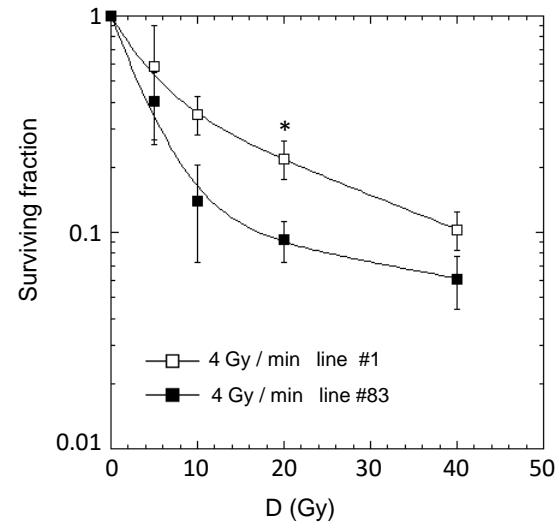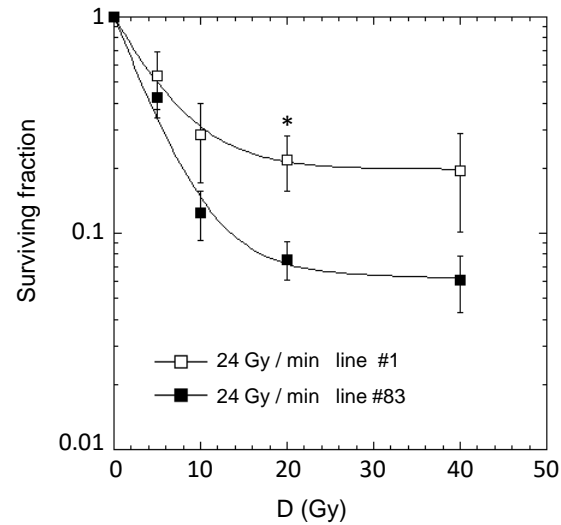

**Figure S3:** Dose-response curves for GSC cells irradiated in FFF conditions at different dose rates. The error bar represents the standard error of the mean (SEM) coming from at least 2 independent experiments for each irradiation condition used. \*  $p < 0.01$

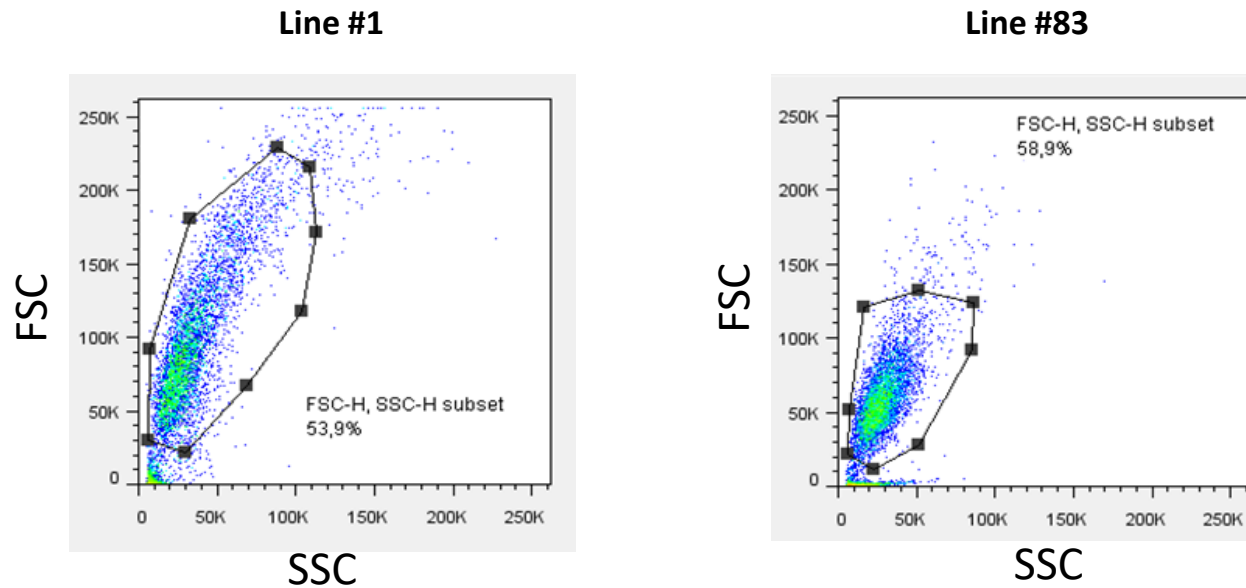

**Figure S4.** Flow Cytometry forward scatter (FSC) versus side scatter (SSC) of GSCs line #1 and line #83 cells. The former detects scatter along the path of the laser and indicates cell size. The latter detects scatter at a ninety-degree angle relative to the laser and provides information about a cell's internal complexity (i.e. granularity).

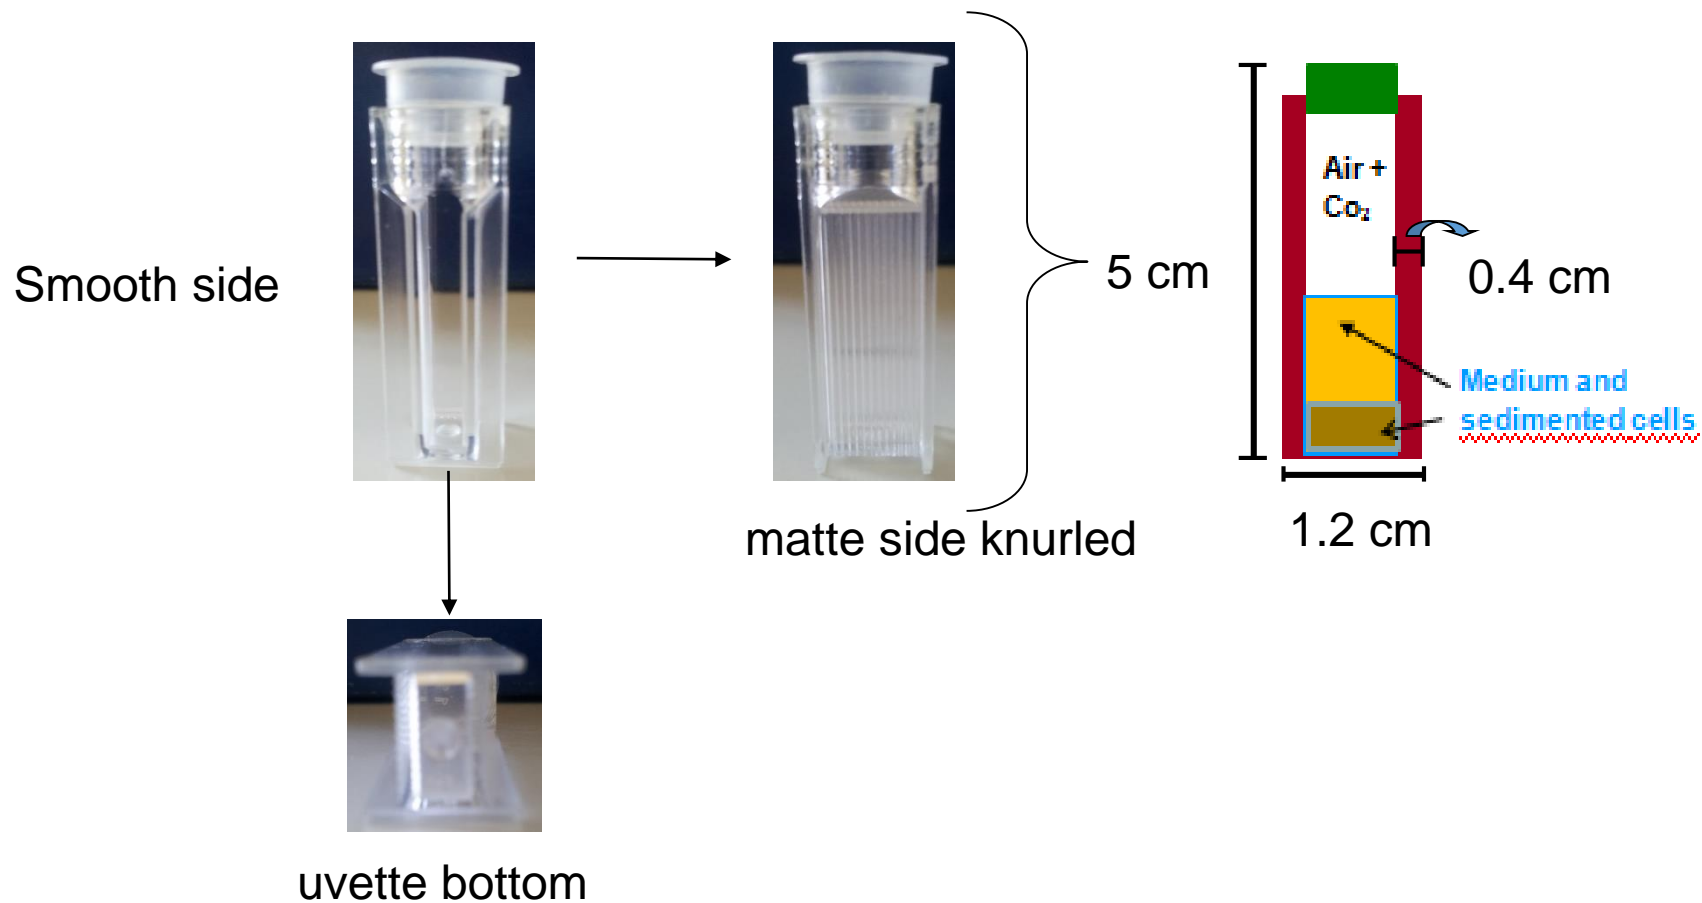

**Figure S5.** Uvettes used for irradiations at 10 MV TrueBeam™ linear accelerator located at the Regina Elena National Cancer Institute (Rome)
